# Supplementary material for: The relative importance of antecedent soil moisture and precipitation in flood generation in the middle and lower Yangtze River basin
Source: Copernicus journal article supplement (doi:10.5194/hess-26-4919-2022), 2022-10-06
Supplement: Supplementary file 1 [file hess-26-4919-2022-supplement.pdf]

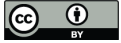

*Supplement of*

**The relative importance of antecedent soil moisture  
and precipitation in flood generation in the  
middle and lower Yangtze River basin**

**Qihua Ran et al.**

*Correspondence to:* Sheng Ye (yesheng@zju.edu.cn)

The copyright of individual parts of the supplement might differ from the article licence.

## Supplementary

To validate our results, we collected the 0-200cm soil moisture from the China Land Data Assimilation System (CLDAS) provided by China Meteorological Administration (CMA) (Wang & Li 2020). 37 catchments covering a range of climate and topography were selected for comparison (Figure S3). Since this dataset only has soil moisture data from 2008, the mean percentile of antecedent soil moisture was calculated from 2008 to 2016 based on the CLDAS soil moisture. This was then compared with the mean percentile based on water balance as in the manuscript (Figure S4). As we can see from Figure S4, the scatters fall around the 1:1 line, that is, the mean percentile calculated from water balance are close to the mean percentile from re-analysis soil moisture. This is consistent with our discussion that averaging through long-term records would be less impacted by the simplification in estimation. Due to the length of CLDAS dataset, we only averaged within 9 years, for the at least 25 years records used in our study, it is likely to be less scatter. While this is just a minimal evaluation of the values, given the goal of this study, we think the averaged percentile of antecedent soil moisture based on the water balance model is acceptable for the purpose of this study at the mean annual scale.

Wang, Y. and Li, G. (2020). Evaluation of simulated soil moisture from China Land Data Assimilation System (CLDAS) land surface models, *Remote Sensing Letters*, 11 (12), 1060 – 1069.

25 **Table S1:** Estimated concentration time for 10 sites with largest drainage area: the ones  
26 on main stream (MS) and the ones at the outlets of major tributaries (TR).

27

| Site Name      | Concentration Time (hr) | Drainage Area (km <sup>2</sup> ) |
|----------------|-------------------------|----------------------------------|
| TR-Hukou       | 17.9                    | 161,979                          |
| TR-Chenglingji | 18.8                    | 261,986                          |
| MS-Zhutuo      | 32.7                    | 668,661                          |
| MS-Cuntan      | 32.8                    | 827,799                          |
| MS-Wanxian     | 37.6                    | 948,524                          |
| MS-Yichang     | 41.5                    | 982,948                          |
| MS-Jianli      | 45.2                    | 1,014,690                        |
| MS-Luoshan     | 46.3                    | 1,276,676                        |
| MS-Hankou      | 51.0                    | 1,432,008                        |
| MS-Datong      | 54.3                    | 1,657,604                        |

28

29

30

31

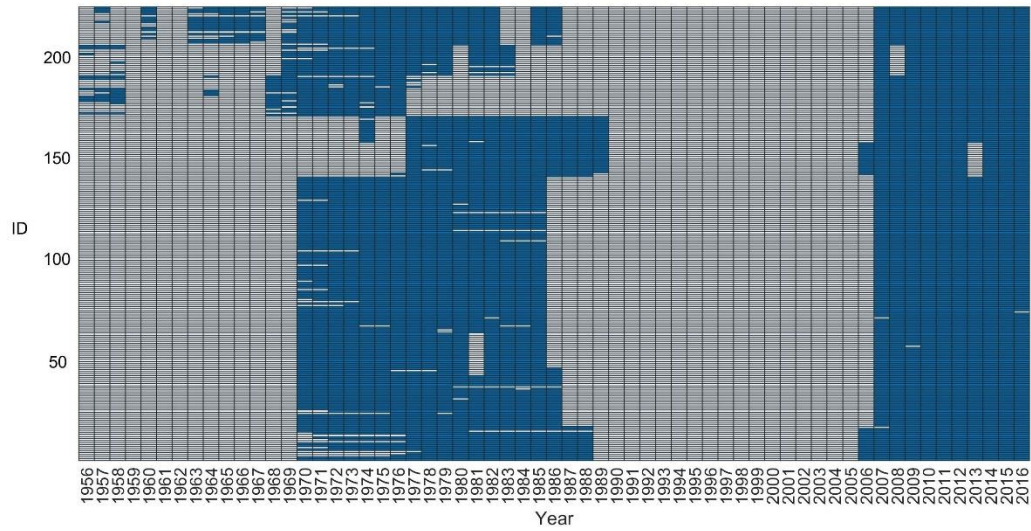

32

33 **Figure S1:** The data availability of each station, each column indicates each year while  
 34 each row is corresponding to each station, blue grid indicates there is record of this year.

35

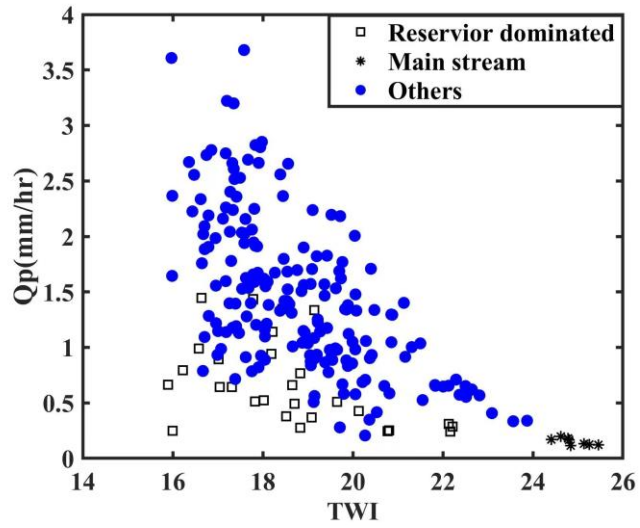

36

37 **Figure S2:** Scatterplot between the topographic wetness index (TWI) and area weighted  
38 annual maximum discharge (Q<sub>p</sub>).

39

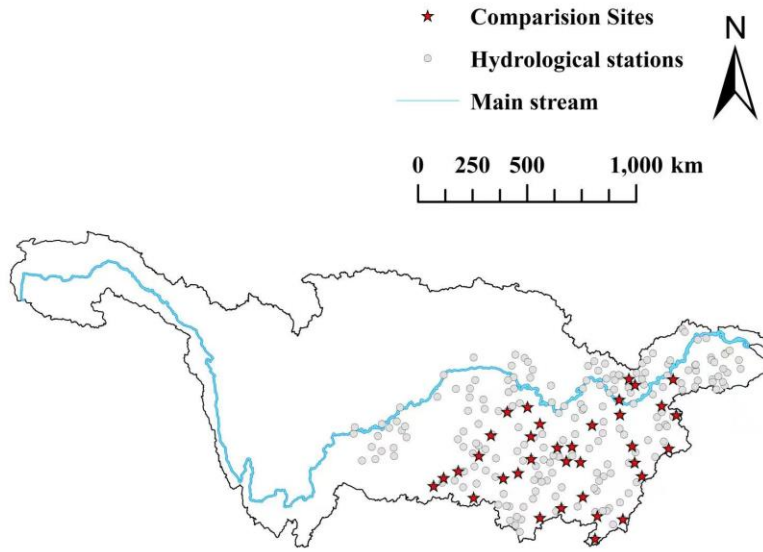

40  
41 **Figure S3:** Map of the 37 selected stations used for comparison. Fuhe station and its  
42 two tributaries' stations almost coincide in the figure.  
43

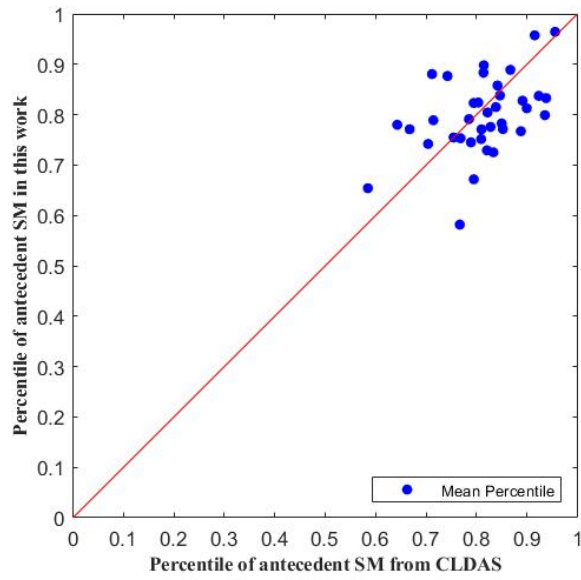

44  
45  
46  
47  
48  
49  
50

**Figure S4:** Comparison between the mean percentile of antecedent soil moisture in our work and the percentile of antecedent soil moisture from re-analysis dataset CLDAS (China Land Data Assimilation System). The red line is the 1:1 line.
